# Supplementary material
Source: HighWire-hosted journal article supplement (https://www.cmaj.ca/highwire/filestream/79394/field_highwire_adjunct_files/0/201843-image-1-at.pdf)
Supplement: 201843-image-1-at.pdf [file 201843-image-1-at.pdf]

Appendix 1 (as submitted by the authors): Supplementary figure

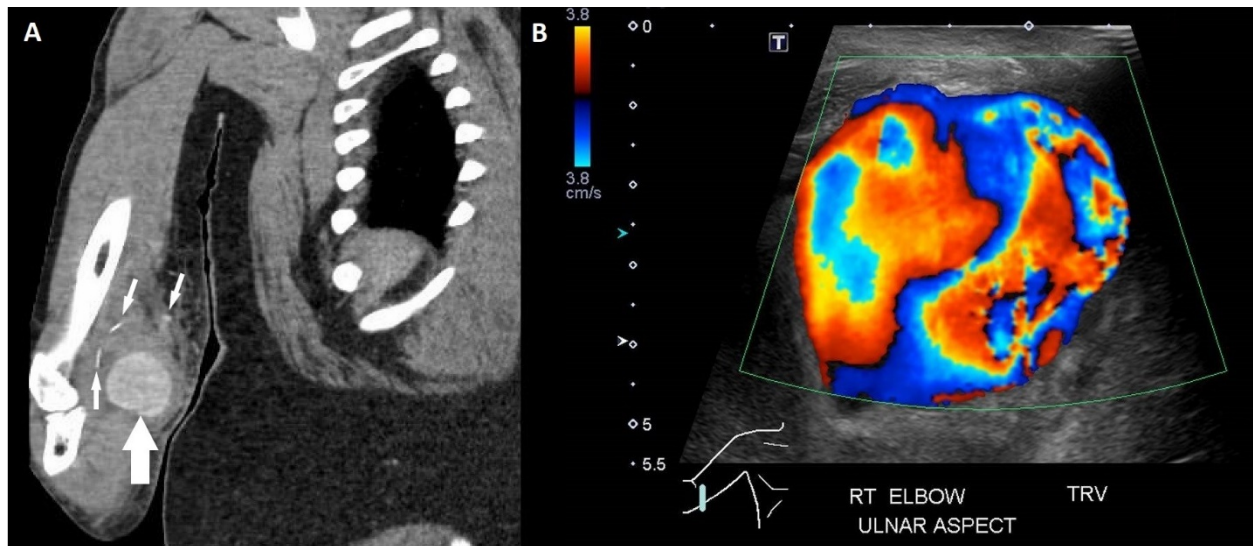

Computed tomography angiography (A) showing a 4.8 × 4.8cm brachial artery pseudoaneurysm (large white arrow) with multiple 0.7–1.0cm needle fragments (small white arrows) in the surrounding tissues. The Doppler ultrasound (B) demonstrates turbulent flow.
